# Supplementary material for: The plant metabolome guides fitness-relevant foraging decisions of a specialist herbivore
Source: PubMed Central journal article supplement (PMC7924754; doi:10.1371/journal.pbio.3001114), 2021-02-18
Supplement: pbio.3001114.s002.pdf [file pbio.3001114.s002.pdf]

| Nr | Compound class | Compound Name                 | Molecular formula                                             | Retention time [min] | MS adducts        | Progenesis Q1 fragmentation score | Characteristic fragments [m/z]         |
|----|----------------|-------------------------------|---------------------------------------------------------------|----------------------|-------------------|-----------------------------------|----------------------------------------|
| 1  | Benzoxazinoid  | DHBOA-Glc                     | C <sub>14</sub> H <sub>17</sub> NO <sub>9</sub>               | 1.3                  | M-H, M+FA-H, 2M-H | 16.5                              | 180.0303, 162.0200                     |
| 2  | Benzoxazinoid  | DIBOA-Glc                     | C <sub>14</sub> H <sub>17</sub> NO <sub>9</sub>               | 1.91                 | M-H, M+FA-H, 2M-H | 2.6                               | 180.0303, 162.0200, 134.0247           |
| 3  | Benzoxazinoid  | HMBOA-Glc                     | C <sub>15</sub> H <sub>19</sub> NO <sub>9</sub>               | 2.11                 | M-H, M+FA-H, 2M-H | 10.3                              | 194.0459, 166.0511                     |
| 4  | Benzoxazinoid  | DIMBOA-Glc                    | C <sub>15</sub> H <sub>19</sub> NO <sub>10</sub>              | 2.18                 | M-H, M+FA-H, 2M-H | 5.9                               | 210.0406, 192.0302, 164.0356, 149.0119 |
| 5  | Benzoxazinoid  | DIM <sub>2</sub> BOA-Glc      | C <sub>16</sub> H <sub>21</sub> NO <sub>11</sub>              | 2.22                 | M-H, M+FA-H, 2M-H | 21.7                              | 222.0408, 194.0458                     |
| 6  | Benzoxazinoid  | HMBOA                         | C <sub>9</sub> H <sub>9</sub> NO <sub>4</sub>                 | 2.3                  | M-H               | n/a                               | -                                      |
| 7  | Benzoxazinoid  | DIMBOA                        | C <sub>9</sub> H <sub>9</sub> NO <sub>5</sub>                 | 2.42                 | M-H               | n/a                               | 164.0353, 149.0118                     |
| 8  | Benzoxazinoid  | HDMBOA-Glc                    | C <sub>16</sub> H <sub>21</sub> NO <sub>10</sub>              | 2.74                 | M-H, M+FA-H, 2M-H | 11.5                              | 224.0564, 194.0460                     |
| 9  | Benzoxazinoid  | HDM <sub>2</sub> BOA-Glc      | C <sub>17</sub> H <sub>23</sub> NO <sub>11</sub>              | 2.74                 | M+FA-H            | n/a                               | 254.0789                               |
| 10 | Organic acid   | Chlorogenic acid              | C <sub>16</sub> H <sub>18</sub> O <sub>9</sub>                | 1.77                 | M-H, 2M-H         | 24.3                              | 191.0562                               |
| 11 | Organic acid   | Feruloylglucose               | C <sub>16</sub> H <sub>20</sub> O <sub>9</sub>                | 2.05                 | M-H               | 81                                | 175.0404                               |
| 12 | Organic acid   | Sinapoylglucose               | C <sub>17</sub> H <sub>22</sub> O <sub>10</sub>               | 2.09                 | M-H               | 36.7                              | 223.0615, 205.0507                     |
| 13 | Organic acid   | Quinic acid                   | C <sub>17</sub> H <sub>12</sub> O <sub>6</sub>                | 0.33*                | M-H, 2M-H         | 70.1                              | -                                      |
| 14 | Organic acid   | Coumaroylquinic acid isomer   | C <sub>16</sub> H <sub>18</sub> O <sub>8</sub>                | 1.7                  | M-H               | 98                                | 163.0409                               |
| 15 | Organic acid   | Coumaroylquinic acid isomer   | C <sub>16</sub> H <sub>18</sub> O <sub>8</sub>                | 2.13                 | M-H               | 51.6                              | 191.0561, 173.0455                     |
| 16 | Organic acid   | Feruloylquinic acid isomer    | C <sub>17</sub> H <sub>20</sub> O <sub>9</sub>                | 2.35                 | M-H               | 46.1                              | 191.0562                               |
| 17 | Organic acid   | Feruloylquinic acid isomer    | C <sub>17</sub> H <sub>20</sub> O <sub>9</sub>                | 2.61                 | M-H               | n/a                               | -                                      |
| 18 | Flavonol       | Quercetin rhamnosylglucoside  | C <sub>27</sub> H <sub>30</sub> O <sub>16</sub>               | 2.66                 | M-H               | 65.7                              | 301.0353                               |
| 19 | Flavonol       | Quercetin glucoside           | C <sub>21</sub> H <sub>20</sub> O <sub>12</sub>               | 2.75                 | M-H               | 26                                | 301.0347, 271.0252                     |
| 20 | Flavonol       | Quercetin malonylglucoside    | C <sub>24</sub> H <sub>22</sub> O <sub>15</sub>               | 2.91                 | M-H               | 75.1                              | 505.0986, 301.0345                     |
| 21 | Flavonol       | Kaempferol rhamnosylglucoside | C <sub>27</sub> H <sub>30</sub> O <sub>15</sub>               | 2.94                 | M-H               | 98.9                              | 285.0412                               |
| 22 | Flavonol       | Kaempferol glucoside          | C <sub>21</sub> H <sub>20</sub> O <sub>11</sub>               | 3.04                 | M-H               | 88.6                              | 285.0395, 255.0304                     |
| 23 | Flavonol       | Kaempferol malonylglucoside   | C <sub>24</sub> H <sub>22</sub> O <sub>14</sub>               | 3.25                 | M-H               | 96.5                              | 489.1037, 285.0400                     |
| 24 | Amino acid     | Leucine                       | C <sub>6</sub> H <sub>13</sub> NO <sub>2</sub>                | 0.8                  | M-H               | n/a                               | -                                      |
| 25 | Amino acid     | Phenylalanine                 | C <sub>9</sub> H <sub>11</sub> NO <sub>2</sub>                | 1.1                  | M-H               | n/a                               | -                                      |
| 26 | Amino acid     | Tryptophan                    | C <sub>11</sub> H <sub>12</sub> N <sub>2</sub> O <sub>2</sub> | 1.5                  | M-H, M+FA-H       | n/a                               | -                                      |
| 27 | Sugar          | Monosaccharide                | C <sub>6</sub> H <sub>12</sub> O <sub>6</sub>                 | 0.31*                | M-H               | n/a                               | -                                      |
| 28 | Sugar          | Disaccharide                  | C <sub>12</sub> H <sub>22</sub> O <sub>11</sub>               | 0.34*                | M-H, M+FA-H, 2M-H | 3.2                               | -                                      |
