# Supplementary material for: The plant metabolome guides fitness-relevant foraging decisions of a specialist herbivore
Source: PubMed Central journal article supplement (PMC7924754; doi:10.1371/journal.pbio.3001114), 2021-02-18
Supplement: pbio.3001114.s003.pdf [file pbio.3001114.s003.pdf]

| Nr | Compound class     | Compound Name                        | Behavioral effect                                    | Reference |
|----|--------------------|--------------------------------------|------------------------------------------------------|-----------|
| 1  | Benzoxazinoid      | MBOA                                 | Host location (long-distance)                        | [1]       |
| 2  | Benzoxazinoid      | Fe-DIMBOA                            | Host location & acceptance (short-distance)          | [2]       |
| 3  | Benzoxazinoid      | Fe-DIMBOA-Glc                        | Host location & acceptance (short-distance)          | [2]       |
| 4  | Sugar              | Glucose                              | Feeding stimulation                                  | [3]       |
| 5  | Sugar              | Fructose                             | Feeding stimulation                                  | [3]       |
| 6  | Sugar              | Sucrose                              | Feeding stimulation                                  | [3]       |
| 7  | Fatty acid         | Linoleic acid                        | Arrestment, feeding stimulation (within sugar blend) | [3]       |
| 8  | Fatty acid         | Oleic acid                           | Feeding stimulation (within sugar blend)             | [3]       |
| 9  | Fatty acid         | Monoga-lactosyldiacylglycerol        | Host recognition (tight turning behavior)            | [4]       |
| 10 | Aminobenzole       | Methyl anthranilate                  | Host avoidance (repellent)                           | [5]       |
| 11 | Terpene            | ( <i>E</i> )- $\beta$ -caryophyllene | Host location and discrimination (long distance)     | [6,7]     |
| 12 | Alkene             | Ethylene                             | Host location and discrimination (long-distance)     | [8]       |
| 13 | Inorganic compound | CO <sub>2</sub>                      | Host location (long-distance)                        | [9]       |

#### REFERENCE

1. Bjostad LB, Hibbard BE. 6-Methoxy-2-benzoxazolinone: A semiochemical for host location by western corn rootworm larvae. *J Chem Ecol.* 1992; 18:931–44. doi: 10.1007/BF00980054 PMID: 24254139.
2. Hu L, Mateo P, Ye M, Zhang X, Berset JD, Handrick V, et al. Plant iron acquisition strategy exploited by an insect herbivore. *Science.* 2018; 361:694–7. doi: 10.1126/science.aat4082 PMID: 30115808
3. Bernklau EJ, Bjostad LB. Identification of feeding stimulants in corn roots for western corn rootworm (Coleoptera: Chrysomelidae) larvae. *J Econ Entomol.* 2008; 101:341–51. doi: 10.1093/jee/101.2.341.
4. Bernklau EJ, Hibbard BE, Dick DL, Rithner CD, Bjostad LB. Monogalactosyldiacylglycerols as host recognition cues for western corn rootworm larvae (Coleoptera: Chrysomelidae). *J Econ Entomol.* 2015; 108:539–48. doi: 10.1093/jee/tov025 PMID: 26470164.
5. Bernklau EJ, Hibbard BE, Norton AP, Bjostad LB. Methyl anthranilate as a repellent for western corn rootworm larvae (Coleoptera: Chrysomelidae). *J Econ Entomol.* 2016; 109:1683–90. doi: 10.1093/jee/tow090 PMID: 27122493.
6. Robert CAM, Erb M, Hiltbold I, Hibbard BE, Gaillard MDP, Bilat J, et al. Genetically engineered maize plants reveal distinct costs and benefits of constitutive volatile emissions in the field. *Plant Biotechnol J.* 2013; 11:628–39. doi: 10.1111/pbi.12053 PMID: 23425633.
7. Robert CAM, Erb M, Hibbard BE, Wade French B, Zwahlen C, Turlings TCJ. A specialist root herbivore reduces plant resistance and uses an induced plant volatile to aggregate in a density-dependent manner. *Funct Ecol.* 2012; 26:1429–40. doi: 10.1111/j.1365-2435.2012.02030.x.
8. Robert CAM, Erb M, Duployer M, Zwahlen C, Doyen GR, Turlings TCJ. Herbivore-induced plant volatiles mediate host selection by a root herbivore. *New Phytol.* 2012; 194:1061–9. doi: 10.1111/j.1469-8137.2012.04127.x PMID: 22486361.
9. Bernklau EJ, Bjostad LB. Reinvestigation of host location by western corn rootworm larvae (Coleoptera: Chrysomelidae): CO<sub>2</sub> is the only volatile attractant. *J Econ Entomol.* 1998; 91:1331–40. doi: 10.1093/jee/91.6.1331.
