# Supplementary material for: The plant metabolome guides fitness-relevant foraging decisions of a specialist herbivore
Source: PubMed Central journal article supplement (PMC7924754; doi:10.1371/journal.pbio.3001114), 2021-02-18

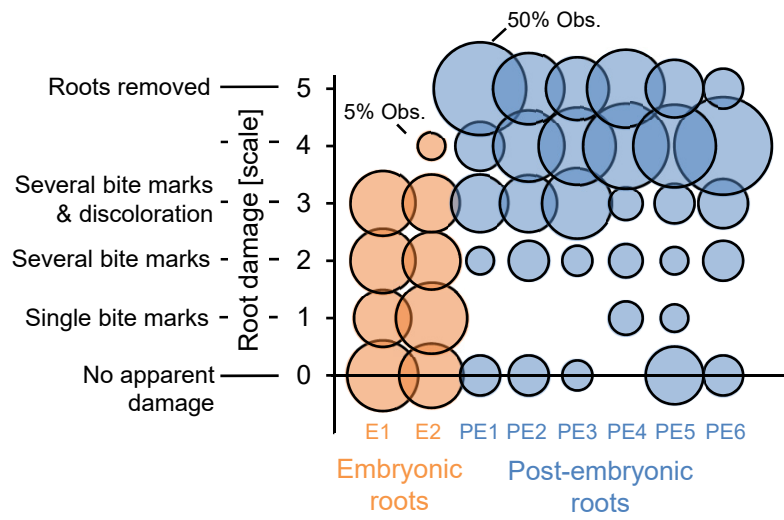

Supplement: pbio.3001114.s004.pdf [file pbio.3001114.s004.pdf]
